# Supplementary material for: Abaloparatide followed by alendronate in women ≥80 years with osteoporosis: post hoc analysis of ACTIVExtend
Source: PubMed Central journal article supplement — Menopause. 2020 Jul 13;27(10):1137–42. doi: 10.1097/GME.0000000000001593 (PMC7515468; doi:10.1097/gme.0000000000001593), 2020-07-13
Supplement: menop-27-1137-s003.pdf [file menop-27-1137-s003.pdf]

**Supplemental Table 1.** Characteristics of ACTIVEExtend Participants Aged  $\geq 80$  Years at ACTIVE Baseline (ITT Population)

| Characteristics                                                                | Abaloparatide/Alendronate <sup>a</sup> | Placebo/Alendronate <sup>b</sup> |
|--------------------------------------------------------------------------------|----------------------------------------|----------------------------------|
|                                                                                | $\geq 80$ yr (n = 29)                  | $\geq 80$ yr (n = 27)            |
| Age in years, mean (SD)                                                        | 81.8 (1.5)                             | 81.8 (1.6)                       |
| BMI, mean (SD)                                                                 | 25.2 (2.8)                             | 25.5 (3.5)                       |
| Years since menopause, mean (SD)                                               | 33.1 (4.8)                             | 31.3 (4.3)                       |
| Race n (%)                                                                     |                                        |                                  |
| White                                                                          | 18 (62.1)                              | 16 (59.3)                        |
| Asian                                                                          | 9 (31.0)                               | 9 (33.3)                         |
| Black or African-American                                                      | 2 (6.9)                                | 2 (7.4)                          |
| Other                                                                          | 0                                      | 0                                |
| Hispanic or Latino, n (%)                                                      | 11 (37.9)                              | 10 (37.0)                        |
| BMD T-score, mean (SD)                                                         |                                        |                                  |
| Lumbar spine                                                                   | -2.57 (1.42)                           | -3.03 (0.81)                     |
| Total hip                                                                      | -2.08 (0.70)                           | -2.39 (0.72)                     |
| Femoral neck                                                                   | -2.39 (0.60)                           | -2.60 (0.63)                     |
| Prevalent vertebral fracture at baseline, n (%) <sup>c</sup>                   | 12 (41.4)                              | 5 (18.5)                         |
| At least 1 prior nonvertebral fracture within past 5 years, n (%) <sup>d</sup> | 5 (17.2)                               | 5 (18.5)                         |

Note: Participant characteristics taken at baseline from ACTIVE.

BMD, bone mineral density; BMI, body mass index; ITT, intent-to-treat; SD, standard deviation.

<sup>a</sup>Baseline characteristics at ACTIVE baseline of participants from the abaloparatide group in ACTIVE who were subsequently treated with alendronate in ACTIVEExtend.

<sup>b</sup>Baseline characteristics at ACTIVE baseline of participants from the placebo group in ACTIVE who were subsequently treated with alendronate in ACTIVEExtend.

<sup>c</sup>Evaluated by Bioclinica-Synarc.

<sup>d</sup>Excluded fractures of the spine, sternum, patella, toes, fingers, skull, and facial bones.
